# Supplementary material for: Update to an evaluation of ICD-11 PTSD and complex PTSD criteria in a sample of adult survivors of childhood institutional abuse by Knefel & Lueger-Schuster (2013): a latent profile analysis
Source: PubMed Central journal article supplement (PMC4283031; doi:10.3402/ejpt.v6.25290), 2015-01-02
Supplement: EJPT-6-25290-s003.pdf [file EJPT-6-25290-s003.pdf]

## **A BNO-11-es komplex PTSD diagnózis újraértékelése intézményes gyermekkori abúzus felnőtt túlélői körében: egy látens profilelemzés (Knefel & Lueger-Schuster, 2013)**

Matthias Knefel, Donn W Garvert, Marylène Cloitre, Brigitte Lueger-Schuster

### Abstract

Háttér: A WHO Betegségek Nemzetközi Osztályozása 11. kiadása (BNO-11) egy új, traumával kapcsolatos diagnózist vezetett be, a komplex poszttraumás stressz zavart (CPTSD), amely különbözik és elkülönül a poszttraumás stressz zavar (PTSD) diagnózistól.

Célkitűzés: Annak meghatározása, hogy intézményes abúzuson átesett, a CPTSD-vel konzisztens tünetek mutató személyek tünetei elkülönülnek a PTSD-től.

Módszer: Látens profilelemzést végeztek (LPA) 229 intézményes abúzust túlélő felnőtt személyen a Brief Symptom Inventory-t (BSI) és a PTSD Checklist – Civilian Version-t (PCL-C) felhasználva.

Eredmények: Az LPA alapján négy osztály különült el: (1) emelkedett CPTSD tünetek (PTSD tünetek és az énszerveződés zavara); (2) emelkedett PTSD tünetek, de nincs énszerveződési zavar; (3) énszerveződés zavara, de alacsonyabb szintű PTSD tünetek, (4) nincs tünet.

Következtetések: Az eredmények alátámasztják azt, hogy létezik egy elkülönült csoport, amelynek a tüneteit a CPTSD sokkal pontosabban leírja, mint a PTSD. Továbbá, van egy olyan csoport, amely nem éri el egyik traumával kapcsolatos diagnózis kritériumát sem, de mégis vannak pszichés tünete.

Keywords: komplex PTSD, poszttraumás stressz zavar, intézményes abúzus, WHO, BNO-11, látens profilelemzés, gyermekkori bántalmazás

Name of translator: Kinga Fodor

European Journal of Psychotraumatology 2014, 5: 25290 - <http://dx.doi.org/10.3402/ejpt.v5.25290>
